# Supplementary material
Source: PubMed Central journal article supplement (PMC7615120)
Supplement: EMS187868-supplement-Appendix.pdf [file EMS187868-supplement-Appendix.pdf]

## Web appendix

### Table of Contents

|                                                                                                                     | Page |
|---------------------------------------------------------------------------------------------------------------------|------|
| <b>Detailed statistical methods</b>                                                                                 | 2    |
| <b>Appendix Table 1:</b> Information about cohorts used in estimating the coefficients of the risk score            | 5    |
| <b>Appendix Table 2:</b> Characteristics and summary statistics for health examination surveys used in the analysis | 6    |
| <b>Appendix Table 3:</b> Characteristics of the cohort studies used for external validation                         | 7    |
| <b>Appendix Table 4:</b> Results of validation of the fatal CVD model                                               | 7    |
| <b>Appendix Table 5:</b> Population in risk category (%) of 10 year fatal CVD by country, sex, and age group.       | 8    |
| <b>Appendix Figure 1:</b> Age-standardised CVD death rates per 100,000 by country and year                          | 9    |
| <b>References</b>                                                                                                   | 10   |

## Detailed statistical methods

### *Model estimation*

We used sex- and cohort-stratified Cox proportional hazards regression to estimate the coefficients of the risk function, similar to previous cohort pooling projects.<sup>1-5</sup> The risk predictors (smoking, diabetes, serum total cholesterol and systolic blood pressure) were measured at baseline. Participants' age was used as the time scale,<sup>6</sup> which allows age-specific cardiovascular disease (CVD) rates to vary across cohorts, and hence across populations to which the risk score is applied. This parameterization allows the risk equation to be recalibrated to each country, and each sex and age group within it, by replacing the age-sex-specific CVD rates from the pooled cohorts with those from the application country. We included interaction terms between all risk factors and age and, as described in the main paper, between sex and diabetes, and sex and smoking based on previous evidence.

The Cox model is given as:

$$\lambda_i(t) = \lambda_{0,k}(t) \exp\left(\sum_{l=1}^4 \beta_l X_{i,l} + \sum_{l=1}^4 \delta_l t X_{i,l} + \sum_{l=3}^4 \gamma_l \text{sex}_i X_{i,l}\right) \quad (1)$$

where subscript  $i$  denotes individual participants in the cohorts;  $k$  denotes sex-cohort combination;  $l$  denotes risk factors in the risk prediction equation (1: systolic blood pressure, 2: total cholesterol, 3: diabetes, and 4: smoking);  $t$  denotes age in years;  $X_{i,l}$  is the level of the risk factor  $l$  for individual  $i$  at baseline;  $\beta_l$  is the log hazard ratio (HR) for the main effect of each risk factor,  $\delta_l$  is the coefficient for linear interaction between risk factor  $l$  and age, and  $\gamma_l$  is the coefficient for interaction between diabetes and smoking, and sex; and  $\lambda_{0,k}(t)$  is the age-specific

hazard of CVD at the average level of risk factors for participants of sex-cohort  $k$ .  $\lambda_{0,k}(t)$  is conceptually equivalent to an age-specific version of the  $So(t)$  parameter in the specification used by D'Agostino and colleagues in the Framingham Risk Score.<sup>7</sup> This formulation of the risk prediction equation does not need a coefficient for age although it includes interaction terms between age and other risk factors as described below.

### *Risk prediction*

The first step in recalibrating the risk score for a country (and age and sex), is to calculate the CVD rate for each year of follow-up in the 10-year period of risk prediction using the coefficients of the proportional hazards model. For an individual who is aged  $t$  years (e.g. 60 years in the worked out example of Figure 2), this is given by the equation below:

$$\varphi_i(t) = \varphi_{0,k}(t) \exp\left[\sum_{l=1}^4 \beta_l (X_{i,l} - \bar{X}_{l,k,t}) + \sum_{l=1}^4 \delta_l t (X_{i,l} - \bar{X}_{l,k,t}) + \sum_{l=3}^4 \gamma_l \text{sex}_i (X_{i,l} - \bar{X}_{l,k,t})\right] \quad (2)$$

where  $\varphi_{0,k}(t)$  is the age-specific average CVD rate for country-sex  $k$  at age  $t$  (current age and the subsequent 9 years of life) and  $\bar{X}_{l,k,t}$  is the country-sex-specific mean level of risk factor  $l$  at age  $t$ , i.e. at the time of risk prediction (analogous to the baseline in the cohorts that were used for estimating the coefficients). In practice, event rates and risk factor levels are often available in 5-year age groups in national populations.

The estimated 10-year risk of CVD for an individual aged  $t$  years at the time of risk prediction is:

$$P_i(CVD) = 1 - \prod_{j=t}^{t+9} (\exp(-\varphi_i(j))) \quad (3)$$

where  $j$  denotes the age for individual  $i$  at the time of risk prediction and in the 9 subsequent years of their life, and  $\varphi_i(j)$  is the estimated CVD hazard from the above equation for each of those 10 years of age.

**Appendix Table 1:** Information about cohorts used in estimating the coefficients of the risk score

| Cohort name* | Baseline date | Median follow up (years) | Number of participants | Percent female | Age range at baseline | Mean (SD) age at baseline | Number of fatal plus non-fatal CVD events (% stroke) | Number of fatal CVD (% stroke) | Mean (SD) total cholesterol (mmol/L) | Mean (SD) systolic blood pressure (mmHg) | Current smoking prevalence (%) | Diabetes prevalence (%) |
|--------------|---------------|--------------------------|------------------------|----------------|-----------------------|---------------------------|------------------------------------------------------|--------------------------------|--------------------------------------|------------------------------------------|--------------------------------|-------------------------|
| ARIC         | 1987-89       | 15                       | 13,405                 | 56             | 44-66                 | 54.1 (5.8)                | 2,164 (28)                                           | 368 (17)                       | 5.6 (1.1)                            | 121 (19)                                 | 25.9                           | 10.4                    |
| CHS          | 1989-93       | 13                       | 4,364                  | 60             | 66-90                 | 72.6 (5.5)                | 1,064 (57)                                           | 526 (20)                       | 5.5 (1.0)                            | 137 (22)                                 | 12.5                           | 14.7                    |
| FHS          | 1948-51       | 15                       | 3,027                  | 55             | 40-65                 | 50.2 (6.6)                | 412 (31)                                             | 185 (16)                       | 6.1 (1.2)                            | 137 (24)                                 | 54.6                           | 1.6                     |
| FHS-OFF      | 1971          | 15                       | 1,822                  | 49             | 40-62                 | 46.9 (5.1)                | 183 (21)                                             | 67 (10)                        | 5.5 (1.0)                            | 128 (18)                                 | 42.7                           | 3.9                     |
| HHP          | 1965-68       | 15                       | 7,572                  | 0              | 45-68                 | 54.4 (5.6)                | 810 (33)                                             | 359 (37)                       | 5.6 (1.0)                            | 135 (21)                                 | 44.1                           | 6.1                     |
| MRFIT        | 1973-76       | 11                       | 10,481                 | 0              | 40-57                 | 48.0 (4.7)                | 938 (10)                                             | 418 (8)                        | 6.6 (0.9)                            | 148 (16)                                 | 57.3                           | 3.8                     |
| PRHHP        | 1965          | 12                       | 5,416                  | 0              | 42-77                 | 54.4 (6.5)                | 292 (36)                                             | 296 (34)                       | 5.2 (1.1)                            | 133 (23)                                 | 41.4                           | 7.3                     |
| WHICT        | 1993          | 8                        | 4,042                  | 100            | 50-79                 | 62.1 (7.0)                | 179 (45)                                             | 46 (20)                        | 5.8 (1.0)                            | 128 (18)                                 | 8.9                            | 10.0                    |

\* ARIC: atherosclerosis risk in communities; CHS: cardiovascular health study; FHS: Framingham heart study original cohort; FHS-OFF: Framingham heart study offspring cohort; HHP: Honolulu heart program; MRFIT: multiple risk factor intervention trial; PRHHP: Puerto Rico heart health program; WHICT: women’s health initiative clinical trial. Detailed information on these cohorts are provided elsewhere.<sup>8-16</sup> WHICT was stratified on type of intervention.

**Appendix Table 2:** Characteristics and summary statistics for health examination surveys used in the analysis

| Country        | Survey name | Survey Year | Number of participants used in the analysis † | Mean systolic blood pressure (mmHg) | Mean total cholesterol (mmol/L) | Diabetes prevalence (%) | Current smoking prevalence (%) |
|----------------|-------------|-------------|-----------------------------------------------|-------------------------------------|---------------------------------|-------------------------|--------------------------------|
| China          | CHNS        | 2009        | 6,346                                         | 128                                 | 5.0                             | 10                      | 28                             |
| Czech Republic | Post-MONICA | 2007        | 2,478                                         | 131                                 | 5.5                             | 15                      | 30                             |
| Denmark        | DANHES*     | 2008        | 13,787                                        | 131                                 | 5.5                             | 4                       | 16                             |
| England        | HSE*        | 2011        | 1,569                                         | 129                                 | 5.5                             | 12                      | 30                             |
| Iran           | NCDSS       | 2007        | 8,642                                         | 131                                 | 5.1                             | 14                      | 23                             |
| Japan          | NHNS        | 2012        | 11,174                                        | 133                                 | 5.3                             | 12                      | 15                             |
| Malawi         | STEPS       | 2009        | 1,045                                         | 140                                 | 4.5                             | 2                       | 14                             |
| Mexico         | ENSANUT     | 2006        | 4,061                                         | 129                                 | 5.3                             | 27                      | 16                             |
| South Korea    | KNHANES     | 2011        | 3,940                                         | 122                                 | 5.0                             | 13                      | 22                             |
| Spain          | ENRICA      | 2008-10     | 7,822                                         | 133                                 | 5.3                             | 14                      | 23                             |
| United States  | NHANES      | 2011-12     | 1,764                                         | 125                                 | 5.2                             | 18                      | 19                             |

\*Hb1Ac  $\geq$ 6.5% was used for diabetes diagnosis as fasting glucose was not available.

† Number of participants 40-84 years of age who had data on sex, systolic blood pressure, total cholesterol, diabetes, and smoking.

**Appendix Table 3:** Characteristics of the cohort studies used for external validation

| <b>Cohort* characteristics</b>           | <b>SHHEC</b> | <b>TLGS</b> | <b>AusDiab</b> |
|------------------------------------------|--------------|-------------|----------------|
| Baseline date                            | 1984-1992    | 1999-2001   | 1999-2000      |
| Median follow up (years)                 | 10           | 10          | 10             |
| Number of subjects† (% female)           | 12,579 (51)  | 4,097 (57)  | 8,230 (54)     |
| Age range at baseline                    | 40-75        | 40-80       | 40-80          |
| Mean (SD) age at baseline                | 51 (7)       | 54 (10)     | 56 (11)        |
| Number of fatal CVD (% stroke)           | 346 (25)     | 111 (23)    | 166 (37)       |
| Mean (SD) total cholesterol (mmol/L)     | 6.4 (1.2)    | 5.8 (1.2)   | 5.8 (1.1)      |
| Mean (SD) systolic blood pressure (mmHg) | 133 (20)     | 127 (21)    | 132 (19)       |
| Current smoking prevalence (%)           | 46           | 14          | 14             |
| Diabetes prevalence (%)                  | 15           | 19          | 10             |

\*SHHEC: Scottish Heart Health Extended Cohort; TLGS: Tehran Lipid and Glucose Study; AusDiab: Australian Diabetes, Obesity and Lifestyle study

†Participants between 40 and 80 years of age; with no missing risk factor data; and with no history of coronary heart disease or stroke at baseline were included. Detailed information on SHHEC, TLGS and AusDiab have been reported elsewhere.<sup>17-20</sup>

**Appendix Table 4:** Results of validation of the fatal CVD model

|                                                                                     |                    | <b>Discrimination</b>       | <b>Calibration</b>                         |
|-------------------------------------------------------------------------------------|--------------------|-----------------------------|--------------------------------------------|
|                                                                                     | <b>Cohort name</b> | <b>C statistic (95% CI)</b> | <b>Hosmer-Lemeshow Chi-square (p) df=8</b> |
| Internal validation                                                                 | Total              | 71 (70-73)                  | 15.5 (0.051)                               |
|                                                                                     | Men                | 70 (68-72)                  | 20.2 (0.010)                               |
|                                                                                     | Women              | 80 (76-84)                  | 9.8 (0.28)                                 |
| Validation in each of the cohorts iteratively excluded when estimating coefficients | ARIC               | 78 (74-82)                  | 33.3 (<0.0001)                             |
|                                                                                     | CHS                | 67 (62-71)                  | 39.4 (<0.0001)                             |
|                                                                                     | FHS                | 74 (69-80)                  | 7.7 (0.46)                                 |
|                                                                                     | FHS-OFF            | 70 (59-81)                  | 8.1 (0.42)                                 |
|                                                                                     | HHP                | 73 (69-77)                  | 18.4 (0.018)                               |
|                                                                                     | MRFIT              | 60 (57-63)                  | 26.8 (<0.0001)                             |
|                                                                                     | PRHHP              | 77 (73-80)                  | 11.4 (0.18)                                |
|                                                                                     | WHICT              | 76 (66-85)                  | 11.1 (0.20)                                |
| External validation                                                                 | SHHEC              | 74 (71-77)                  | 12.0 (0.15)                                |
|                                                                                     | TLGS               | 83 (79-86)                  | 12.9 (0.12)                                |
|                                                                                     | AusDiab            | 84 (82-87)                  | 44.3 (<0.0001)                             |

**Appendix Table 5:** Population in risk category (%) of 10 year fatal CVD by country, sex, and age group.

|                | Men: 40-64 years |      |      |        |      | Women: 40-64years  |      |      |        |      |
|----------------|------------------|------|------|--------|------|--------------------|------|------|--------|------|
|                | <3%              | 3-6% | 7-9% | 10-14% | ≥15% | <3%                | 3-6% | 7-9% | 10-14% | ≥15% |
| China          | 48.3             | 27.8 | 11.1 | 7.3    | 5.4  | 55.3               | 28.8 | 6.8  | 4.1    | 4.9  |
| Czech Republic | 40.5             | 35.9 | 10.2 | 8.4    | 5.0  | 82.5               | 13.8 | 2.0  | 1.0    | 0.6  |
| Denmark        | 86.7             | 12.4 | 0.7  | 0.2    | 0.0  | 97.9               | 2.0  | 0.1  | 0.1    | 0.0  |
| England        | 85.8             | 11.9 | 1.6  | 0.4    | 0.2  | 96.4               | 2.7  | 0.7  | 0.2    | 0.0  |
| Iran           | 38.9             | 38.1 | 9.8  | 7.7    | 5.5  | 59.6               | 23.9 | 6.6  | 4.5    | 5.4  |
| Japan          | 78.6             | 19.2 | 1.5  | 0.8    | 0.0  | 98.3               | 1.5  | 0.2  | 0.0    | 0.0  |
| Malawi         | 57.4             | 27.6 | 9.8  | 3.2    | 2.1  | 64.3               | 22.3 | 5.9  | 4.9    | 2.7  |
| Mexico         | 68.1             | 24.5 | 3.8  | 3.0    | 0.6  | 84.3               | 12.4 | 2.2  | 1.0    | 0.0  |
| South Korea    | 92.8             | 6.1  | 0.2  | 0.1    | 0.7  | 99.0               | 0.8  | 0.0  | 0.1    | 0.1  |
| Spain          | 88.2             | 10.6 | 0.4  | 0.5    | 0.2  | 99.0               | 1.0  | 0.1  | 0.0    | 0.0  |
| USA            | 73.8             | 21.9 | 2.8  | 0.4    | 1.0  | 92.6               | 6.8  | 0.3  | 0.2    | 0.1  |
|                | Men: 65-84 years |      |      |        |      | Women: 65-84 years |      |      |        |      |
|                | <3%              | 3-6% | 7-9% | 10-14% | ≥15% | <3%                | 3-6% | 7-9% | 10-14% | ≥15% |
| China          | 0.0              | 0.7  | 5.8  | 12.6   | 81.0 | 0.0                | 1.1  | 8.7  | 18.6   | 71.5 |
| Denmark        | 5.2              | 45.4 | 18.7 | 14.9   | 15.8 | 35.1               | 37.7 | 10.9 | 7.7    | 8.6  |
| England        | 4.2              | 35.7 | 19.5 | 14.9   | 25.8 | 29.9               | 24.9 | 11.0 | 11.5   | 22.7 |
| Japan          | 8.4              | 44.9 | 18.4 | 12.9   | 15.4 | 47.3               | 27.6 | 8.5  | 4.1    | 12.5 |
| Mexico         | 0.0              | 21.5 | 14.4 | 15.1   | 49.0 | 4.4                | 31.3 | 10.1 | 19.3   | 34.9 |
| South Korea    | 7.0              | 42.2 | 15.0 | 18.0   | 17.8 | 29.6               | 30.9 | 12.1 | 10.2   | 17.2 |
| Spain          | 11.7             | 43.4 | 15.5 | 14.9   | 14.5 | 44.2               | 31.0 | 8.2  | 5.4    | 11.2 |
| USA            | 2.9              | 33.2 | 21.7 | 16.2   | 26.0 | 22.7               | 30.6 | 7.8  | 19.4   | 19.5 |
|                | Men: 40-84 years |      |      |        |      | Women: 40-84 years |      |      |        |      |
|                | <3%              | 3-6% | 7-9% | 10-14% | ≥15% | <3%                | 3-6% | 7-9% | 10-14% | ≥15% |
| China          | 36.5             | 21.2 | 9.8  | 8.6    | 23.9 | 42.2               | 22.3 | 7.3  | 7.5    | 20.7 |
| Denmark        | 61.9             | 22.5 | 6.2  | 4.7    | 4.8  | 78.7               | 12.9 | 3.4  | 2.4    | 2.6  |
| England        | 60.7             | 19.2 | 7.1  | 4.8    | 8.1  | 77.1               | 9.2  | 3.7  | 3.5    | 6.6  |
| Japan          | 43.5             | 32.0 | 9.9  | 6.8    | 7.7  | 74.9               | 13.5 | 4.0  | 1.9    | 5.7  |
| Mexico         | 54.6             | 23.9 | 5.9  | 5.4    | 10.2 | 69.0               | 16.0 | 3.8  | 4.5    | 6.7  |
| South Korea    | 76.8             | 12.8 | 3.0  | 3.4    | 3.9  | 82.4               | 8.0  | 2.9  | 2.5    | 4.2  |
| Spain          | 66.8             | 19.8 | 4.7  | 4.6    | 4.2  | 80.2               | 11.3 | 2.9  | 1.8    | 3.8  |
| USA            | 54.8             | 24.9 | 7.8  | 4.7    | 7.7  | 72.6               | 13.6 | 2.4  | 5.7    | 5.7  |



**Appendix Figure 1:** Age-standardised CVD death rates per 100,000 people by country and year. The WHO standard population was used for age-standardisation.

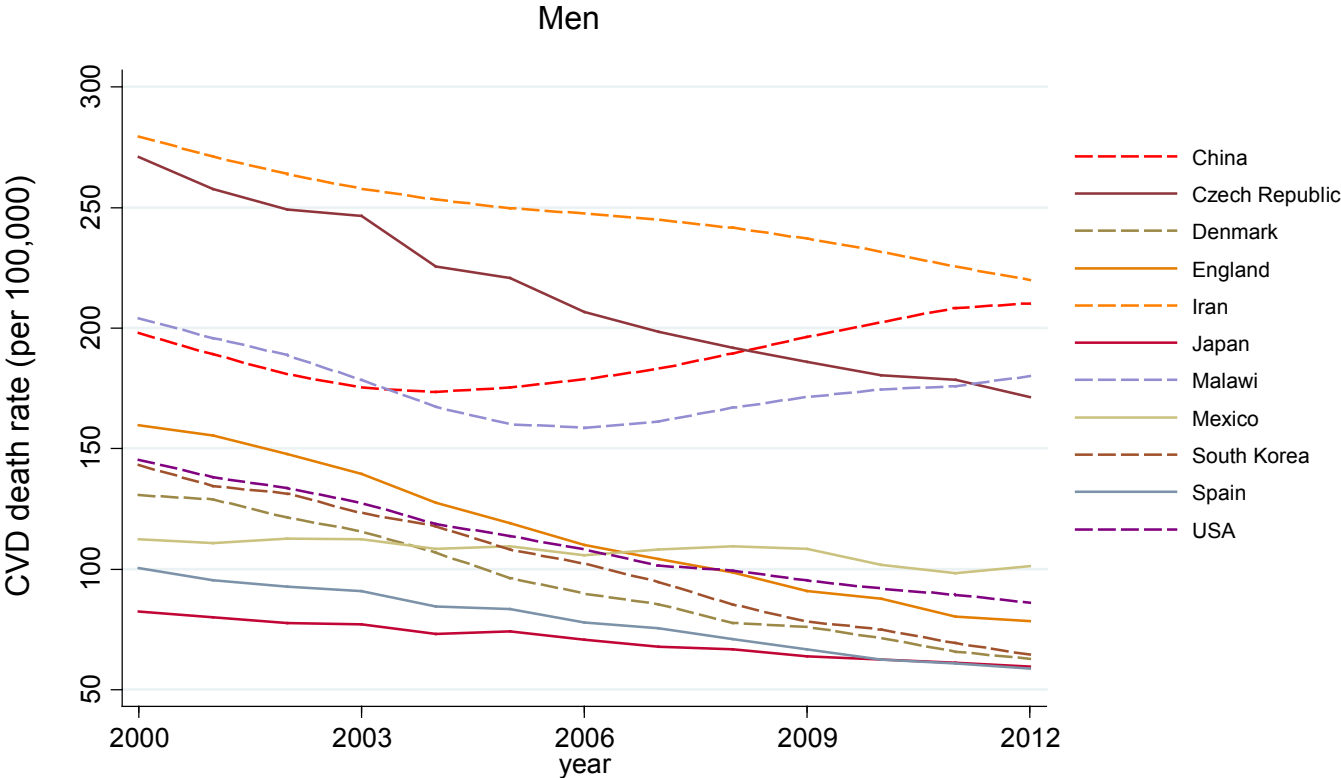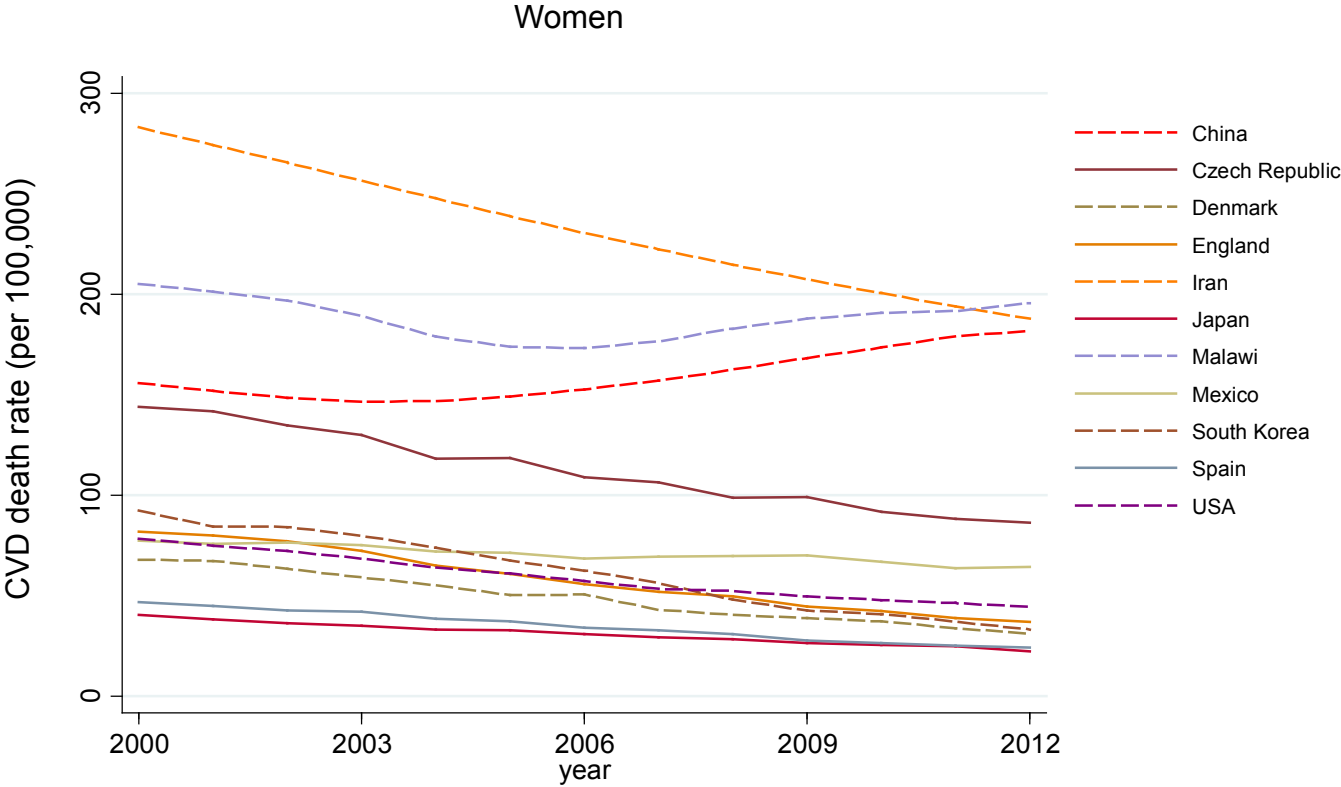

## References

1. Lawes CM, Parag V, Bennett DA, Suh I, Lam TH, Whitlock G, et al. Blood glucose and risk of cardiovascular disease in the Asia Pacific region. *Diabetes Care*. 2004; **27**(12): 2836-42.
2. Lawes CM, Rodgers A, Bennett DA, Parag V, Suh I, Ueshima H, et al. Blood pressure and cardiovascular disease in the Asia Pacific region. *Journal of hypertension*. 2003; **21**(4): 707-16.
3. Zhang X, Patel A, Horibe H, Wu Z, Barzi F, Rodgers A, et al. Cholesterol, coronary heart disease, and stroke in the Asia Pacific region. *International journal of epidemiology*. 2003; **32**(4): 563-72.
4. Lewington S, Clarke R, Qizilbash N, Peto R, Collins R. Age-specific relevance of usual blood pressure to vascular mortality: a meta-analysis of individual data for one million adults in 61 prospective studies. *Lancet*. 2002; **360**(9349): 1903-13.
5. Lewington S, Whitlock G, Clarke R, Sherliker P, Emberson J, Halsey J, et al. Blood cholesterol and vascular mortality by age, sex, and blood pressure: a meta-analysis of individual data from 61 prospective studies with 55,000 vascular deaths. *Lancet*. 2007; **370**(9602): 1829-39.
6. Thiebaut AC, Benichou J. Choice of time-scale in Cox's model analysis of epidemiologic cohort data: a simulation study. *Statistics in medicine*. 2004; **23**(24): 3803-20.
7. D'Agostino RB, Sr., Grundy S, Sullivan LM, Wilson P. Validation of the Framingham coronary heart disease prediction scores: results of a multiple ethnic groups investigation. *JAMA*. 2001; **286**(2): 180-7.
8. Dawber TR, Meadors GF, Moore FE, Jr. Epidemiological approaches to heart disease: the Framingham Study. *American journal of public health and the nation's health*. 1951; **41**(3): 279-81.
9. Kannel WB, Feinleib M, McNamara PM, Garrison RJ, Castelli WP. An investigation of coronary heart disease in families. The Framingham offspring study. *American journal of epidemiology*. 1979; **110**(3): 281-90.
10. Kjelsberg MO, Cutler JA, Dolecek TA. Brief description of the Multiple Risk Factor Intervention Trial. *The American journal of clinical nutrition*. 1997; **65**(1 Suppl): 191S-5S.
11. Garcia-Palmieri MR, Feliberti M, Costas R, Jr., Colon AA, Cruz-Vidal M, Cortes-Alicea M, et al. An epidemiological study on coronary heart disease in Puerto Rico: The Puerto Rico Heart Health Program. *Boletin de la Asociacion Medica de Puerto Rico*. 1969; **61**(6): 174-9.
12. Worth RM, Kagan A. Ascertainment of men of Japanese ancestry in Hawaii through World War II Selective Service registration. *Journal of chronic diseases*. 1970; **23**(5): 389-97.
13. Design of the Women's Health Initiative clinical trial and observational study. The Women's Health Initiative Study Group. *Controlled clinical trials*. 1998; **19**(1): 61-109.
14. The Atherosclerosis Risk in Communities (ARIC) Study: design and objectives. The ARIC investigators. *American journal of epidemiology*. 1989; **129**(4): 687-702.
15. Tell GS, Fried LP, Hermanson B, Manolio TA, Newman AB, Borhani NO. Recruitment of adults 65 years and older as participants in the Cardiovascular Health Study. *Annals of epidemiology*. 1993; **3**(4): 358-66.
16. Kagan A, Harris BR, Winkelstein W, Jr., Johnson KG, Kato H, Syme SL, et al. Epidemiologic studies of coronary heart disease and stroke in Japanese men living in Japan, Hawaii and California: demographic, physical, dietary and biochemical characteristics. *Journal of chronic diseases*. 1974; **27**(7-8): 345-64.

17. Lewsey JD, Lawson KD, Ford I, Fox KA, Ritchie LD, Tunstall-Pedoe H, et al. A cardiovascular disease policy model that predicts life expectancy taking into account socioeconomic deprivation. *Heart*. 2014.
18. Dunstan DW, Zimmet PZ, Welborn TA, Cameron AJ, Shaw J, de Courten M, et al. The Australian Diabetes, Obesity and Lifestyle Study (AusDiab)--methods and response rates. *Diabetes research and clinical practice*. 2002; **57**(2): 119-29.
19. Tohidi M, Mohebi R, Cheraghi L, Hajsheikholeslami F, Aref S, Nouri S, et al. Lipid profile components and incident cerebrovascular events versus coronary heart disease; the result of 9 years follow-up in Tehran Lipid and Glucose Study. *Clinical biochemistry*. 2013; **46**(9): 716-21.
20. Azizi F, Rahmani M, Emami H, Mirmiran P, Hajipour R, Madjid M, et al. Cardiovascular risk factors in an Iranian urban population: Tehran lipid and glucose study (phase 1). *Sozial- und Praventivmedizin*. 2002; **47**(6): 408-26.
